# Supplementary material for: Ubiquitin C-terminal hydrolase L1 (UCHL1) regulates post-myocardial infarction cardiac fibrosis through glucose-regulated protein of 78 kDa (GRP78)
Source: PubMed Central journal article supplement (PMC7326919; doi:10.1038/s41598-020-67746-4), 2020-06-30
Supplement: 41598_2020_67746_MOESM1_ESM.pdf [file 41598_2020_67746_MOESM1_ESM.pdf]

## SUPPLEMENTARY INFORMATION

### **Ubiquitin C-terminal hydrolase L1 (UCHL1) regulates post-myocardial infarction cardiac fibrosis through glucose-regulated protein of 78 kDa (GRP78)**

Qian Lei<sup>1</sup>, Tao Yi<sup>3</sup>, Hang Li<sup>1</sup>, Zhijie Yan<sup>1</sup>, Zhan Lv<sup>1</sup>, Gerui Li<sup>1</sup>, Yanggan Wang<sup>1, 2\*</sup>

<sup>1</sup>Department of Internal Medicine, Zhongnan Hospital of Wuhan University, Wuhan University, Wuhan 4300/1, China

<sup>2</sup>Medical Research Institute of Wuhan University, Wuhan University, Wuhan, China

<sup>3</sup>Department of Cardiology, Zhongshan People's Hospital, Zhongshan, China

\*Corresponding author. E-mail address: Wangyg-wuhan@outlook.com

Contributions: QL designed the study and wrote the article. TY collected and analysed the data. HL, ZJY, ZL, and GRL provided technical support. YGW revised the article.

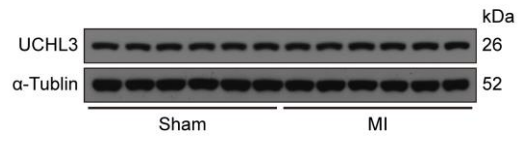

**Supplemental Fig. 1** Western blot and average data showing UCHL3 protein level in hearts of Sham/MI group. n = 6.

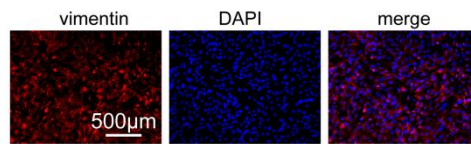

**Supplemental Fig. 2** Immunofluorescence staining of vimentin in CFs.
